# Supplementary material for: Monodisperse Uniform CeO2Nanoparticles: Controlled Synthesis and Photocatalytic Property
Source: Hindawi journal article supplement (doi:10.1155/2016/8682747), 2016-01-01

## **Electronic Supplementary information (ESI) for**

### **Monodisperse uniform CeO<sub>2</sub> nanoparticles: Controlled synthesis and photocatalytic property**

**Le Thi Thanh Tuyen<sup>a</sup>, Dinh Quang Khieu<sup>a</sup>, Hoang Thai Long<sup>a</sup>, Duong Tuan Quang<sup>c</sup>,  
Tran Thai Hoa<sup>a,\*</sup>, Nguyen Duc Cuong<sup>a,b,\*</sup>**

<sup>a</sup> College of Sciences, Hue University, 77 Nguyen Hue, Phu Nhuan Ward, Hue City, Vietnam

<sup>b</sup> Faculty of Hospitality and Tourism, Hue University, 22 Lam Hoang, Vy Da Ward, Hue City, Vietnam

<sup>c</sup> College of Education, Hue University, 34 Le Loi, Hue City, Viet Nam

**\*E-mail: [nguyenduccuong@hueuni.edu.vn](mailto:nguyenduccuong@hueuni.edu.vn)/[trthaihoa@yahoo.com](mailto:trthaihoa@yahoo.com)**

**Figure S1.** The particles size distribution analysis of CeO<sub>2</sub> nanoparticles synthesized at 160 and 180 °C.

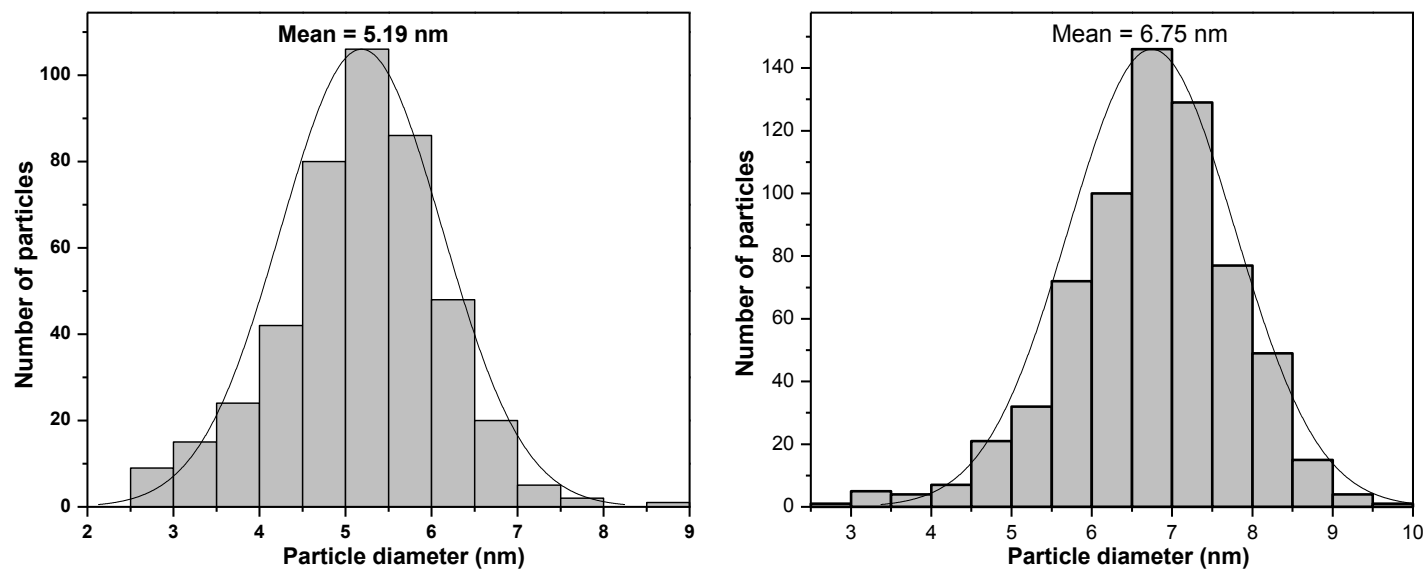

**Figure S2.** TEM images of CeO<sub>2</sub> nanoparticles synthesized at 200 °C.

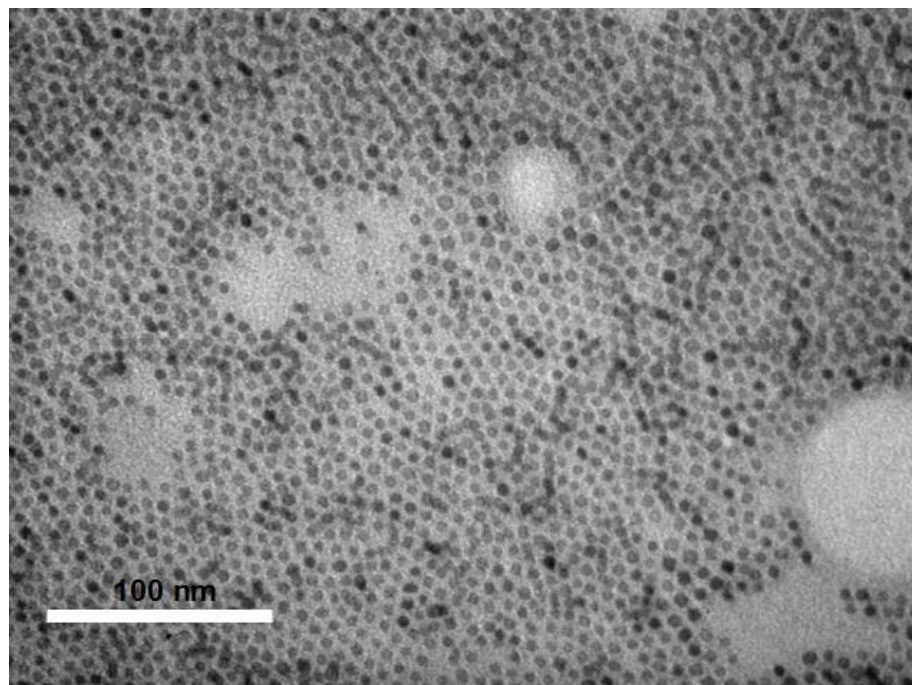

Supplement: f1 [file 8682747.f1.pdf]
